# Supplementary material for: Occurrence of Neonatal Necrotizing Enterocolitis in Premature Neonates and Gut Microbiota: A Case–Control Prospective Multicenter Study
Source: MDPI journal article supplement (doi:10.3390/microorganisms11102457), 2023-09-29

**Table S1.** Summary of the 54 virulence genes, phylogroup affiliation, and capsular groups of the *Escherichia coli* strains isolated from controls, as detected by polymerase chain reaction assay.

| Strain ID         | 311 | 608 | C277  | 606 | C276 | C469    | 561 | 623 | 306 | C7 | C8 | C9 | C79 | C80 | C196    | C206    | C233    |
|-------------------|-----|-----|-------|-----|------|---------|-----|-----|-----|----|----|----|-----|-----|---------|---------|---------|
| Phylogroup        | A   | B2  | B2    | B2  | B2   | B2      | B2  | B2  | B2  | D  | D  | D  | D   | D   | D       | D       | D       |
| Capsular group    | NA  | K1  | K1/K5 | K5  | K5   | K2/K100 | NA  | NA  | NA  | K1 | K1 | K1 | K15 | K15 | Group 3 | Group 3 | Group 3 |
| <i>malX (PAI)</i> |     |     | •     |     | •    | •       |     |     |     |    |    |    |     |     |         |         |         |
| <i>K15</i>        |     |     |       |     |      |         |     |     |     |    |    |    | •   | •   |         |         |         |
| <i>fimH</i>       | •   | •   | •     | •   | •    | •       | •   | •   | •   | •  | •  | •  | •   | •   | •       | •       | •       |
| <i>kpsIII</i>     |     |     |       |     |      |         |     |     |     |    |    |    |     |     | •       | •       | •       |
| <i>yfcV</i>       |     | •   | •     | •   | •    | •       | •   |     | •   |    |    |    |     |     |         |         |         |
| <i>ibeA</i>       |     |     |       |     |      |         |     | •   |     |    |    |    |     |     |         |         |         |
| <i>concnf</i>     |     | •   | •     | •   | •    |         |     |     |     |    |    |    |     |     |         |         |         |
| <i>fyuA</i>       | •   | •   | •     | •   | •    | •       | •   |     | •   |    |    |    | •   | •   |         | •       | •       |
| <i>clbB</i>       | •   | •   | •     | •   | •    | •       | •   |     |     | •  | •  | •  |     |     |         | •       | •       |
| <i>bmaE</i>       |     |     |       |     |      |         |     |     |     |    |    |    |     |     |         |         |         |
| <i>iutA</i>       |     | •   | •     | •   | •    | •       | •   |     | •   |    |    |    |     | •   | •       |         |         |
| <i>hra</i>        |     |     | •     | •   |      |         |     |     |     |    |    |    | •   |     |         |         |         |
| <i>hlyD</i>       |     |     | •     |     |      |         | •   |     |     |    |    |    |     |     |         |         |         |
| <i>rfe</i>        |     |     |       |     |      |         |     |     |     |    |    |    |     |     |         |         |         |
| <i>ompT</i>       | •   | •   | •     | •   | •    | •       | •   | •   | •   | •  | •  | •  |     |     |         |         | •       |
| <i>iss</i>        |     |     |       |     |      |         |     |     | •   |    |    |    |     |     |         |         |         |
| <i>kii</i>        | •   | •   | •     | •   | •    |         | •   |     | •   | •  | •  | •  |     |     |         |         |         |
| <i>vat</i>        |     |     |       |     |      |         |     |     |     |    |    |    |     |     |         |         |         |
| <i>gafD</i>       |     |     |       |     |      |         |     |     |     |    |    |    |     |     |         |         |         |
| <i>K5</i>         |     | •   |       |     | •    |         |     |     |     |    |    |    |     |     |         |         |         |
| <i>cvaC</i>       |     |     |       |     |      |         |     |     | •   |    |    |    |     |     |         |         |         |
| <i>H7</i>         |     |     |       |     |      |         |     |     |     |    |    |    |     |     |         |         |         |
| <i>cdtB/cdtB'</i> |     | •   | •     | •   | •    | •       | •   | •   |     |    |    |    |     |     |         |         |         |
| <i>traT</i>       | •   | •   | •     | •   | •    | •       | •   | •   | •   | •  | •  | •  | •   | •   |         |         | •       |
| <i>iha</i>        |     | •   | •     | •   | •    | •       | •   | •   |     |    |    |    |     |     |         | •       | •       |



**Table S2.** Summary of the 54 virulence genes, phylogroup affiliation, and capsular groups of the *Escherichia coli* strains isolated from NEC cases, as detected by polymerase chain reaction assay.

| Strain ID         | C439 | C74 | C345    | C325 |
|-------------------|------|-----|---------|------|
| Phylogroup        | B2   | D   | D       | E    |
| Capsular group    | NA   | K15 | Group 3 | K1   |
| <i>malX (PAI)</i> | •    |     |         |      |
| <i>K15</i>        |      | •   |         |      |
| <i>fimH</i>       | •    | •   | •       | •    |
| <i>kpsIII</i>     |      |     | •       |      |
| <i>yfcV</i>       | •    |     |         |      |
| <i>ibeA</i>       |      |     |         |      |
| <i>concnf</i>     |      |     |         |      |
| <i>fyuA</i>       |      | •   | •       |      |
| <i>clbB</i>       | •    |     |         |      |
| <i>bmaE</i>       |      |     |         |      |
| <i>iutA</i>       |      |     |         | •    |
| <i>hra</i>        |      |     |         |      |
| <i>hlyD</i>       |      |     |         |      |
| <i>rfc</i>        |      |     |         |      |
| <i>ompT</i>       |      |     |         | •    |
| <i>iss</i>        |      |     |         |      |
| <i>kii</i>        |      |     |         | •    |
| <i>vat</i>        |      |     |         |      |
| <i>gafD</i>       |      |     |         |      |
| <i>K5</i>         |      |     |         |      |
| <i>evaC</i>       |      |     |         | •    |
| <i>H7</i>         |      |     |         |      |
| <i>cdtB/cdtB'</i> |      |     |         | •    |
| <i>traT</i>       |      |     | •       | •    |
| <i>iha</i>        | •    | •   |         |      |
| <i>hlyF</i>       |      |     |         | •    |

|                        |           |
|------------------------|-----------|
| <i>tsh</i>             |           |
| <i>sfaS</i>            |           |
| <i>K1</i>              |           |
| <i>sat</i>             |           |
| <i>clbN</i>            |           |
| <i>f17</i>             |           |
| <i>kpsII</i>           |           |
| <i>uidA</i>            | • • • • • |
| <i>usp</i>             | •         |
| <i>clpG</i>            |           |
| <i>afaE8</i>           | • • •     |
| <i>chuA</i>            |           |
| <i>astA (EAST)</i>     |           |
| <i>papG I</i>          |           |
| <i>papG II, III</i>    | • •       |
| <i>papG allele I</i>   |           |
| <i>papG allele I*</i>  | •         |
| <i>papG allele II</i>  |           |
| <i>papG allele III</i> |           |
| <i>papAH</i>           | •         |
| <i>papC</i>            | •         |
| <i>papEF</i>           |           |
| <i>afa</i>             | • •       |
| <i>sfa</i>             |           |
| <i>focG</i>            |           |
| <i>pic</i>             |           |
| <i>ireA</i>            |           |
| <i>iroNec</i>          | •         |

•: positive results. NA: unidentified.

**Table S3.** Distribution of virulence genes according to the phylogroup B2 and D (p-values are calculated using the two-sided Fisher's exact test; significance:  $p < 0.05$ ).

| Virulence genes   | Phylogroup B2   |             |          | Phylogroup D    |             |          |
|-------------------|-----------------|-------------|----------|-----------------|-------------|----------|
|                   | Control (n = 8) | NEC (n = 1) | <i>p</i> | Control (n = 8) | NEC (n = 2) | <i>p</i> |
|                   | % (n)           | % (n)       |          | % (n)           | % (n)       |          |
| <i>malX (PAI)</i> | 37,5 (3)        | 100 (1)     | 0.44     | 0 (0)           | 0 (0)       | 1.00     |
| <i>K15</i>        | 0 (0)           | 0 (0)       | 1.00     | 25 (2)          | 50 (1)      | 1.00     |
| <i>fimH</i>       | 100 (8)         | 100 (1)     | 1.00     | 100 (8)         | 100 (2)     | 1.00     |
| <i>kpsIII</i>     | 0 (0)           | 0 (0)       | 1.00     | 37,5 (3)        | 50 (1)      | 1.00     |
| <i>yfcV</i>       | 87,5 (7)        | 100 (1)     | 1.00     | 0 (0)           | 0 (0)       | 1.00     |
| <i>ibeA</i>       | 12,5 (1)        | 0 (0)       | 1.00     | 0 (0)           | 0 (0)       | 1.00     |
| <i>concnf</i>     | 37,5 (3)        | 0 (0)       | 1.00     | 0 (0)           | 0 (0)       | 1.00     |
| <i>fyuA</i>       | 87,5 (7)        | 0 (0)       | 0.22     | 50 (4)          | 100 (2)     | 0.47     |
| <i>clbB</i>       | 75 (6)          | 100 (1)     | 1.00     | 62,5 (5)        | 0 (0)       | 0.44     |
| <i>bmaE</i>       | 0 (0)           | 0 (0)       | 1.00     | 0 (0)           | 0 (0)       | 1.00     |
| <i>iutA</i>       | 75 (6)          | 0 (0)       | 0.33     | 25 (2)          | 0 (0)       | 1.00     |
| <i>hra</i>        | 12,5 (1)        | 0 (0)       | 1.00     | 12,5 (1)        | 0 (0)       | 1.00     |
| <i>hlyD</i>       | 25 (2)          | 0 (0)       | 1.00     | 0 (0)           | 0 (0)       | 1.00     |
| <i>rjc</i>        | 0 (0)           | 0 (0)       | 1.00     | 0 (0)           | 0 (0)       | 1.00     |
| <i>ompt</i>       | 100 (8)         | 0 (0)       | 0.11     | 37,5 (3)        | 0 (0)       | 1.00     |
| <i>iss</i>        | 12,5 (1)        | 0 (0)       | 1.00     | 0 (0)           | 0 (0)       | 1.00     |
| <i>kii</i>        | 75 (6)          | 0 (0)       | 0.33     | 37,5 (3)        | 0 (0)       | 1.00     |
| <i>vat</i>        | 0 (0)           | 0 (0)       | 1.00     | 0 (0)           | 0 (0)       | 1.00     |
| <i>gafD</i>       | 0 (0)           | 0 (0)       | 1.00     | 0 (0)           | 0 (0)       | 1.00     |
| <i>K5</i>         | 25 (2)          | 0 (0)       | 1.00     | 0 (0)           | 0 (0)       | 1.00     |
| <i>cvaC</i>       | 12,5 (1)        | 0 (0)       | 1.00     | 0 (0)           | 0 (0)       | 1.00     |
| <i>H7</i>         | 0 (0)           | 0 (0)       | 1.00     | 0 (0)           | 0 (0)       | 1.00     |
| <i>cdtB/cdtB'</i> | 25 (2)          | 0 (0)       | 1.00     | 0 (0)           | 0 (0)       | 1.00     |
| <i>traT</i>       | 75 (6)          | 0 (0)       | 0.33     | 75 (6)          | 50 (1)      | 1.00     |
| <i>iha</i>        | 62,5 (5)        | 100 (1)     | 1.00     | 25 (2)          | 50 (1)      | 1.00     |
| <i>hlyF</i>       | 12,5 (1)        | 0 (0)       | 1.00     | 12,5 (1)        | 0 (0)       | 1.00     |
| <i>tsh</i>        | 0 (0)           | 0 (0)       | 1.00     | 0 (0)           | 0 (0)       | 1.00     |
| <i>sfaS</i>       | 12,5 (1)        | 0 (0)       | 1.00     | 0 (0)           | 0 (0)       | 1.00     |
| <i>K1</i>         | 37,5 (3)        | 0 (0)       | 1.00     | 37,5 (3)        | 0 (0)       | 1.00     |
| <i>sat</i>        | 62,5 (5)        | 0 (0)       | 0.44     | 0 (0)           | 0 (0)       | 1.00     |
| <i>clbN</i>       | 75 (6)          | 0 (0)       | 0.33     | 0 (0)           | 0 (0)       | 1.00     |
| <i>fl7</i>        | 0 (0)           | 0 (0)       | 1.00     | 0 (0)           | 0 (0)       | 1.00     |
| <i>kipsII</i>     | 87,5 (7)        | 0 (0)       | 0.22     | 37,5 (3)        | 0 (0)       | 1.00     |
| <i>uidA</i>       | 100 (8)         | 100 (1)     | 1.00     | 100 (8)         | 100 (2)     | 1.00     |
| <i>usp</i>        | 87,5 (7)        | 0 (0)       | 0.22     | 0 (0)           | 0 (0)       | 1.00     |
| <i>clpG</i>       | 0 (0)           | 0 (0)       | 1.00     | 0 (0)           | 0 (0)       | 1.00     |
| <i>afaE8</i>      | 100 (8)         | 100 (1)     | 1.00     | 100 (8)         | 50 (1)      | 0.20     |
| <i>chuA</i>       | 0 (0)           | 0 (0)       | 1.00     | 0 (0)           | 0 (0)       | 1.00     |

|                        |          |         |      |          |        |      |
|------------------------|----------|---------|------|----------|--------|------|
| <i>astA (EAST)</i>     | 0 (0)    | 0 (0)   | 1.00 | 0 (0)    | 0 (0)  | 1.00 |
| <i>papG I</i>          | 12,5 (1) | 0 (0)   | 1.00 | 0 (0)    | 0 (0)  | 1.00 |
| <i>papG II, III</i>    | 62,5 (5) | 100 (1) | 1.00 | 12,5 (1) | 50 (1) | 0.38 |
| <i>papG allele I</i>   | 0 (0)    | 0 (0)   | 1.00 | 0 (0)    | 0 (0)  | 1.00 |
| <i>papG allele I*</i>  | 0 (0)    | 0 (0)   | 1.00 | 62,5 (5) | 0 (0)  | 0.44 |
| <i>papG allele II</i>  | 62,5 (5) | 0 (0)   | 0.44 | 0 (0)    | 0 (0)  | 1.00 |
| <i>papG allele III</i> | 12,5 (1) | 0 (0)   | 1.00 | 0 (0)    | 0 (0)  | 1.00 |
| <i>papAH</i>           | 37,5 (3) | 0 (0)   | 1.00 | 25 (2)   | 50 (1) | 1.00 |
| <i>papC</i>            | 75 (6)   | 0 (0)   | 0.33 | 25 (2)   | 50 (1) | 1.00 |
| <i>papEF</i>           | 37,5 (3) | 0 (0)   | 1.00 | 0 (0)    | 0 (0)  | 1.00 |
| <i>afa</i>             | 0 (0)    | 100 (1) | 0.11 | 25 (2)   | 50 (1) | 1.00 |
| <i>sfa</i>             | 50 (4)   | 0 (0)   | 1.00 | 0 (0)    | 0 (0)  | 1.00 |
| <i>focG</i>            | 50 (4)   | 0 (0)   | 1.00 | 0 (0)    | 0 (0)  | 1.00 |
| <i>pic</i>             | 0 (0)    | 0 (0)   | 1.00 | 0 (0)    | 0 (0)  | 1.00 |
| <i>ireA</i>            | 62,5 (5) | 0 (0)   | 0.44 | 0 (0)    | 0 (0)  | 1.00 |
| <i>iroNec</i>          | 75 (6)   | 0 (0)   | 0.33 | 12,5 (1) | 0 (0)  | 1.00 |

**Table S4.** Antimicrobial susceptibility phenotype of the *Escherichia coli* strains isolated from the controls and the NEC cases.

| Controls | Antibiotics                    | % (n)    |        |         |
|----------|--------------------------------|----------|--------|---------|
|          |                                | S*       | I      | R       |
|          | Amoxicillin                    | 47 (8)   |        | 53 (9)  |
|          | Amoxicillin + Clavulanic acid  | 59 (10)  |        | 41 (7)  |
|          | Ticarcillin                    | 47 (8)   |        | 53 (9)  |
|          | Ticarcillin + Clavulanic acid  | 52 (9)   | 24 (4) | 24 (4)  |
|          | Piperacillin + Tazobactam      | 41 (7)   |        | 59 (10) |
|          | Cefepim                        | 52 (9)   | 24 (4) | 24 (4)  |
|          | Cefotaxim                      | 65 (11)  |        | 35 (6)  |
|          | Cefoxitin                      | 100 (17) |        |         |
|          | Imipenem                       | 100 (17) |        |         |
|          | Nalidixic acid                 | 88 (15)  |        | 12 (2)  |
|          | Ciprofloxacin                  | 71 (12)  |        | 29 (5)  |
|          | Ofloxacin                      | 47 (8)   | 18 (3) | 35 (6)  |
|          | Amikacin                       | 65 (11)  |        | 35 (6)  |
|          | Gentamicin                     | 65 (11)  |        | 35 (6)  |
|          | Tigecyclin                     | 100 (17) |        |         |
|          | Trimethoprim + Sulfamethoxazol | 76 (13)  |        | 24 (4)  |

  

| NEC cases | Antibiotics                   | % (n)  |        |        |
|-----------|-------------------------------|--------|--------|--------|
|           |                               | S*     | I      | R      |
|           | Amoxicillin                   | 25 (1) |        | 75 (3) |
|           | Amoxicillin + Clavulanic acid | 25 (1) |        | 75 (3) |
|           | Ticarcillin                   | 25 (1) |        | 75 (3) |
|           | Ticarcillin + Clavulanic acid | 25 (1) |        | 75 (3) |
|           | Piperacillin + Tazobactam     | 25 (1) |        | 75 (3) |
|           | Cefepim                       | 25 (1) | 50 (2) | 25 (1) |
|           | Cefotaxim                     | 50 (2) |        | 50 (2) |

|                                   |         |        |        |
|-----------------------------------|---------|--------|--------|
| Cefoxitin                         | 100 (4) |        |        |
| Imipenem                          | 100 (4) |        |        |
| Nalidixic acid                    | 75 (3)  |        | 25 (1) |
| Ciprofloxacin                     | 100 (4) |        |        |
| Ofloxacin                         | 25 (1)  | 50 (2) | 25 (1) |
| Amikacin                          | 50 (2)  |        | 50 (2) |
| Gentamicin                        | 75 (3)  |        | 25 (1) |
| Tigecyclin                        | 100 (4) |        |        |
| Trimethoprim +<br>Sulfamethoxazol | 75 (3)  |        | 25 (1) |

\* S, susceptible; I, intermediate; R, resistant [39].

**Table S5.** Antimicrobial susceptibility phenotype of the *Clostridium butyricum* strains.

| Antibiotics                 | % (n)    |         |         |
|-----------------------------|----------|---------|---------|
|                             | S*       | I       | R       |
| Amoxicillin                 | 85 (28)  | 3 (1)   | 11 (4)  |
| Amoxicillin/clavulanic acid | 100 (33) |         |         |
| Piperacillin                | 82 (27)  |         | 18 (6)  |
| Piperacillin/tazobactam     | 88 (29)  | 12 (4)  |         |
| Cefoxitin                   | 100 (33) |         |         |
| Ertapenem                   | 100 (33) |         |         |
| Imipenem                    | 100 (33) |         |         |
| Chloramphenicol             | 100 (33) |         |         |
| Linezolid                   | 100 (33) |         |         |
| Metronidazol                | 100 (33) |         |         |
| Moxifloxacin                | 67 (22)  | 33 (11) |         |
| Tigecyclin                  | 61 (20)  |         | 39 (13) |
| Vancomycine                 | 100 (33) |         |         |

\* S, susceptible; I, intermediate; R, resistant [39].



**Table S6.** Minimal inhibitory concentrations (MICs) of *Clostridium butyricum* and *Clostridium neonatale* strains to tetracycline, clindamycin, and cefotaxime.

|                              | no. of strains for which the antimicrobial agent MIC (mg/L) was: |      |      |     |   |     |    |   |   |   |   |          |          |    |           | MIC (mg/L) |         |
|------------------------------|------------------------------------------------------------------|------|------|-----|---|-----|----|---|---|---|---|----------|----------|----|-----------|------------|---------|
|                              | ≤0.19                                                            | 0.25 | 0.38 | 0.5 | 1 | 1.5 | 2  | 3 | 4 | 6 | 8 | 12       | 16       | 32 | >32       | MIC 50%    | MIC 90% |
| <i>Clostridium butyricum</i> |                                                                  |      |      |     |   |     |    |   |   |   |   |          |          |    |           |            |         |
| Tetracycline                 | 17                                                               |      |      |     |   |     | 2  | 5 | 2 | 2 | 1 | <b>1</b> | <b>2</b> |    | <b>1</b>  | 0.19       | 12      |
| Clindamycin                  | 28                                                               |      | 2    | 1   |   |     | 1  |   | 1 |   |   |          |          |    |           | 0.125      | 0.38    |
| Cefotaxime                   | 2                                                                | 4    | 3    |     | 1 |     |    |   |   |   |   | 1        |          | 10 | <b>12</b> | 32         | >32     |
| <i>Clostridium neonatale</i> |                                                                  |      |      |     |   |     |    |   |   |   |   |          |          |    |           |            |         |
| Tetracycline                 | 8                                                                |      |      |     | 2 | 7   | 11 | 2 | 2 | 2 |   |          |          |    |           | 1.5        | 4       |
| Clindamycin                  | 1                                                                |      |      |     |   |     | 4  | 2 | 6 | 9 | 5 | 5        | <b>2</b> |    |           | 6          | 12      |
| Cefotaxime                   |                                                                  |      |      |     |   |     |    |   |   |   | 1 |          | 7        | 22 | <b>4</b>  | 32         | >32     |

Resistance definition: clindamycin MICs > 4 mg/L; cefotaxime MICs > 32 mg/L; tetracycline MICs > 8 mg/L [39].

**Figure S1.** Proportions of bacterial genera significantly different between C-section (CS) and vaginal delivery (VB) preterm neonates. \*  $p$ -value <0.05.

Mis en forme : Police :Italique

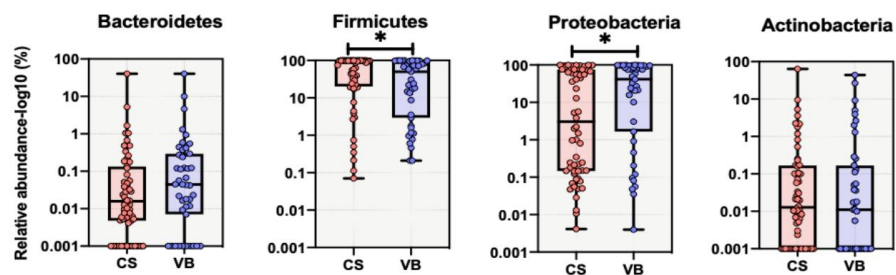

Supplement: s1 [file s1]
